# Supplementary material for: Analysis of Systemic Inflammatory Factors and Survival Outcomes in Endometrial Cancer Patients Staged I-III FIGO and Treated with Postoperative External Radiotherapy
Source: PubMed Central journal article supplement (PMC7291051; doi:10.3390/jcm9051441), 2020-05-12
Supplement: jcm-09-01441-s001.pdf [file jcm-09-01441-s001.pdf]

**Table S1.** Characteristics of patients and tumors.

| Patients' characteristics                              |                                                      | All patients<br><i>n</i> = 155 (100%) | Institut Gustave<br>Roussy <i>n</i> = 77 (49.7%) | Hospital Clínic<br><i>n</i> = 78 (50.3%) |            |
|--------------------------------------------------------|------------------------------------------------------|---------------------------------------|--------------------------------------------------|------------------------------------------|------------|
| Time of follow-up<br>(months)                          | Mean (SD)                                            | 46.3 (23.7)                           | 42.1 (25.8)                                      | 50.4 (20.5)                              |            |
|                                                        | Median (range)                                       | 46.5 (4.0-108)                        | 40.0 (4.0-108.0)                                 | 50.4 (7.2-88.3)                          |            |
| Age at diagnosis<br>(years)                            | Mean (SD)                                            | 62.3 (10.7)                           | 65.2 (10.4)                                      | 65.6 (10.5)                              |            |
|                                                        | Median (range)                                       | 63.2 (27.9-98.9)                      | 64.1 (27.9-98.9)                                 | 65.0 (41.0-90.0)                         |            |
|                                                        | < 65 years                                           | 96 (61.9%)                            | 40 (51.9%)                                       | 34 (43.6%)                               |            |
|                                                        | ≥ 65 years                                           | 59 (38.1%)                            | 37 (48.1%)                                       | 44 (56.4%)                               |            |
|                                                        | IA                                                   | 24 (15.5%)                            | 14 (18.2%)                                       | 10 (12.8%)                               |            |
| FIGO 2009 stage (%)                                    | IB                                                   | 37 (23.9%)                            | 19 (24.7%)                                       | 18 (23.1%)                               |            |
|                                                        | II                                                   | 36 (23.2%)                            | 16 (20.8%)                                       | 20 (25.6%)                               |            |
|                                                        | IIIA                                                 | 16 (10.3%)                            | 12 (15.6%)                                       | 4 (5.1%)                                 |            |
|                                                        | IIIB                                                 | 7 (4.5%)                              | 3 (3.9%)                                         | 4 (5.1%)                                 |            |
|                                                        | IIIC1                                                | 24 (15.5%)                            | 9 (11.7%)                                        | 15 (19.2%)                               |            |
| FIGO 2009 stage III                                    | IIIC2                                                | 11 (7.1%)                             | 4 (5.2%)                                         | 7 (9.0%)                                 |            |
|                                                        | No (stage I-II)                                      | 97 (62.6%)                            | 49 (63.6%)                                       | 48 (61.5%)                               |            |
|                                                        | Yes (stage III)                                      | 58 (37.4%)                            | 28 (36.4%)                                       | 30 (38.5%)                               |            |
| Histology                                              | Endometrioid                                         | 95 (61.3%)                            | 42 (54.5%)                                       | 53 (67.9%)                               |            |
|                                                        | Serous-papillary                                     | 24 (15.5%)                            | 13 (16.9%)                                       | 11 (14.1%)                               |            |
|                                                        | Clear cell                                           | 20 (12.9%)                            | 16 (20.8%)                                       | 4 (5.1%)                                 |            |
| Endometrioid<br>histology                              | Mucinous                                             | 5 (3.2%)                              | 5 (6.5%)                                         | 0 (0%)                                   |            |
|                                                        | Carcinosarcoma                                       | 11 (7.1%)                             | 1 (1.3%)                                         | 10 (12.8%)                               |            |
|                                                        | No                                                   | 60 (38.7%)                            | 35 (45.5%)                                       | 25 (32.1%)                               |            |
| Tumour grade                                           | Yes                                                  | 95 (61.3%)                            | 42 (54.5%)                                       | 53 (67.9%)                               |            |
|                                                        | 1                                                    | 24 (15.5%)                            | 15 (19.5%)                                       | 9 (11.6%)                                |            |
|                                                        | 2                                                    | 35 (22.6%)                            | 15 (19.5%)                                       | 20 (25.6%)                               |            |
| Tumour grade 3                                         | 3                                                    | 96 (61.9%)                            | 47 (61.0%)                                       | 49 (62.8%)                               |            |
|                                                        | No (grade 1-2)                                       | 59 (38.1%)                            | 30 (39.0%)                                       | 29 (37.2%)                               |            |
|                                                        | Yes (grade 3)                                        | 96 (61.9%)                            | 47 (61.0%)                                       | 49 (62.8%)                               |            |
| ESMO-ESGO-ESTRO<br>2015 Risk Assessment<br>groups      | 3                                                    | 13 (8.4%)                             | 10 (13.0%)                                       | 3 (3.8%)                                 |            |
|                                                        | 4                                                    | 134 (86.5%)                           | 63 (81.8%)                                       | 71 (91.0%)                               |            |
|                                                        | 5                                                    | 8 (5.2%)                              | 4 (5.2%)                                         | 4 (5.1%)                                 |            |
| Status at the end of<br>data collection                | Alive                                                | 115 (74.2%)                           | 61 (79.2%)                                       | 54 (69.2%)                               |            |
|                                                        | Alive-disease free                                   | 113 (72.9%)                           | 61 (79.2%)                                       | 52 (66.7%)                               |            |
|                                                        | -Alive                                               | Alive-in<br>progression               | 2 (1.3%)                                         | 0 (0%)                                   | 2 (2.6%)   |
|                                                        | -Dead                                                | Dead (any cause)                      | 40 (25.8%)                                       | 16 (20.8%)                               | 24 (30.8%) |
|                                                        |                                                      | Cancer-related<br>deaths              | 35 (22.6%)                                       | 14 (18.2%)                               | 21 (26.9%) |
| Non cancer-<br>related deaths                          |                                                      | 5 (3.2%)                              | 2 (2.6)                                          | 3 (3.8%)                                 |            |
| Time from surgery to<br>cancer progression<br>(months) | Patients with local<br>or distant<br>progression (%) | 47 (30.3%)                            | 23 (29.9%)                                       | 24 (30.8%)                               |            |
|                                                        | Media (SD)                                           | 17.8 (13.6)                           | 16.3 (11.7)                                      | 19.3 (13.3)                              |            |
|                                                        | Median (range)                                       | 13.0 (0.66-72.5)                      | 14.1 (4.0-72.5)                                  | 15.1 (0.66-51.3)                         |            |

SD: standard deviation, IGR: Institute Gustave Roussy.

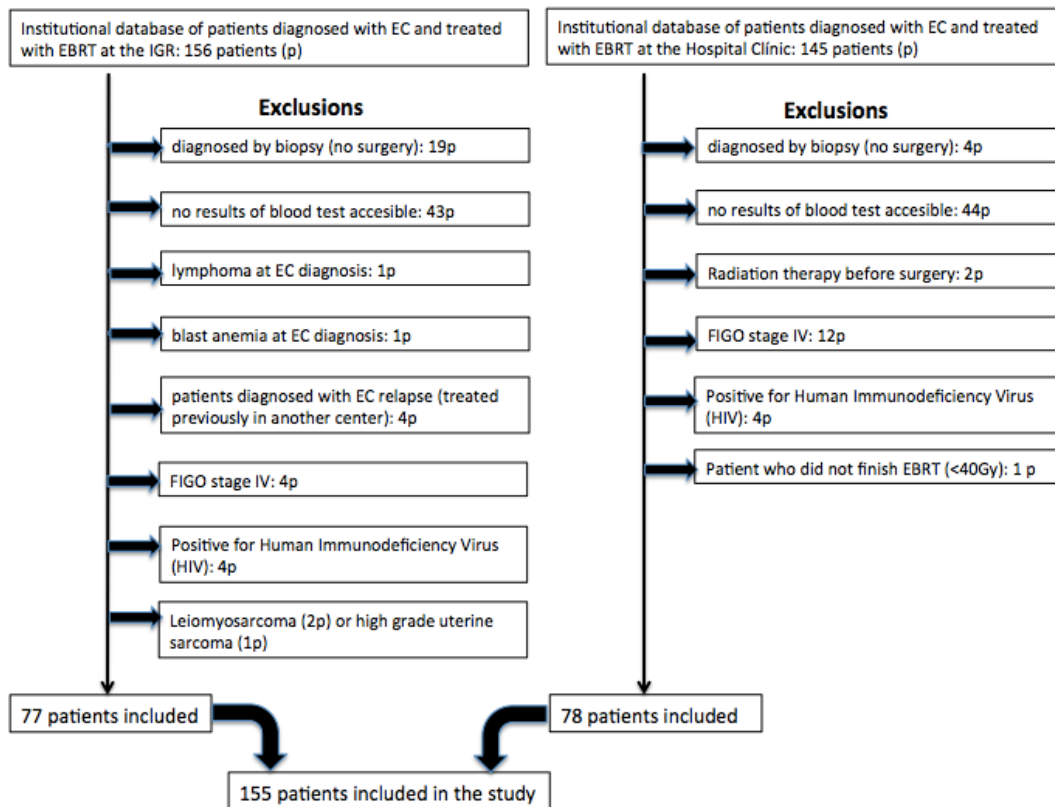

**Figure S1.** Exclusions flowchart ( $n = 155$ ). EC: Endometrial cancer, EBRT: External Beam Radiotherapy, IGR: Institut Gustave Roussy, FIGO: International Federation of Gynecology and Obstetrics.
